# Supplementary material for: The use of everolimus in the treatment of neurocognitive problems in tuberous sclerosis (TRON): study protocol for a randomised controlled trial
Source: PubMed Central journal article supplement (PMC4981993; doi:10.1186/s13063-016-1446-6), 2016-08-11
Supplement: 13063_2016_1446_MOESM2_ESM.pdf [file 13063_2016_1446_MOESM2_ESM.pdf]

---

**Additional File 2. Frequency categories of adverse reactions reported in the pooled analysis considered for the safety pooling.**

Adverse reactions are listed according to MedDRA system organ class and frequency category. Frequency categories are defined using the following convention: very common ( $\geq 1/10$ ); common ( $\geq 1/100$  to  $< 1/10$ ); uncommon ( $\geq 1/1,000$  to  $< 1/100$ ); rare ( $\geq 1/10,000$  to  $< 1/1,000$ ); very rare ( $< 1/10,000$ ). Within each frequency grouping, adverse reactions are presented in order of decreasing seriousness.

|                                             |                                                        |
|---------------------------------------------|--------------------------------------------------------|
| <b>Infections and infestations</b>          |                                                        |
| Very common                                 | Infections a,                                          |
| <b>Blood and lymphatic system disorders</b> |                                                        |
| Very common                                 | Anaemia                                                |
| Common                                      | Thrombocytopenia, neutropenia, leukopenia, lymphopenia |

|                                           |                                                                                                                        |
|-------------------------------------------|------------------------------------------------------------------------------------------------------------------------|
| Uncommon                                  | Pancytopenia                                                                                                           |
| Rare                                      | Pure red cell aplasia                                                                                                  |
| <b>Immune system disorders</b>            |                                                                                                                        |
| Uncommon                                  | Hypersensitivity                                                                                                       |
| <b>Metabolism and nutrition disorders</b> |                                                                                                                        |
| Very common                               | Decreased appetite, hyperglycaemia, hypercholesterolaemia                                                              |
| Common                                    | Hypertriglyceridaemia, hypophosphataemia, diabetes mellitus, hyperlipidaemia, hypokalaemia, dehydration, hypocalcaemia |
| <b>Psychiatric disorders</b>              |                                                                                                                        |
| Common                                    | Insomnia                                                                                                               |
| <b>Nervous system disorders</b>           |                                                                                                                        |
| Very common                               | Dysgeusia, headache                                                                                                    |
| Uncommon                                  | Ageusia                                                                                                                |
| <b>Eye disorders</b>                      |                                                                                                                        |
| Common                                    | Eyelid oedema                                                                                                          |

|                                                        |                                                                                            |
|--------------------------------------------------------|--------------------------------------------------------------------------------------------|
| Uncommon                                               | Conjunctivitis                                                                             |
| <b>Cardiac disorders</b>                               |                                                                                            |
| Uncommon                                               | Congestive cardiac failure                                                                 |
| <b>Vascular disorders</b>                              |                                                                                            |
| Common                                                 | Haemorrhage b, hypertension                                                                |
| Uncommon                                               | Flushing, deep vein thrombosis                                                             |
| <b>Respiratory, thoracic and mediastinal disorders</b> |                                                                                            |
| Very common                                            | Pneumonitis c, epistaxis                                                                   |
| Common                                                 | Cough, dyspnoea                                                                            |
| Uncommon                                               | Haemoptysis, pulmonary embolism                                                            |
| Rare                                                   | Acute respiratory distress syndrome                                                        |
| <b>Gastrointestinal disorders</b>                      |                                                                                            |
| Very common                                            | Stomatitis d, diarrhoea, nausea                                                            |
| Common                                                 | Vomiting, dry mouth, abdominal pain, mucosal inflammation, oral pain, dyspepsia, dysphagia |

|                                                        |                                                                                                                                                  |
|--------------------------------------------------------|--------------------------------------------------------------------------------------------------------------------------------------------------|
| <b>Hepatobiliary disorders</b>                         |                                                                                                                                                  |
| Common                                                 | Aspartate aminotransferase increased, alanine aminotransferase increased                                                                         |
| <b>Skin and subcutaneous tissue disorders</b>          |                                                                                                                                                  |
| Very common                                            | Rash, pruritus                                                                                                                                   |
| Common                                                 | Dry skin, nail disorders, mild alopecia, acne, erythema, onychoclasia, palmar-plantar erythrodysesthesia syndrome, skin exfoliation, skin lesion |
| Rare                                                   | Angioedema                                                                                                                                       |
| <b>Musculoskeletal and connective tissue disorders</b> |                                                                                                                                                  |
| Common                                                 | Arthralgia                                                                                                                                       |
| <b>Renal and urinary disorders</b>                     |                                                                                                                                                  |
| Common                                                 | Proteinuria, blood creatinine increased, renal failure                                                                                           |
| Uncommon                                               | Increased daytime urination, acute renal failure                                                                                                 |
| <b>Reproductive system and breast disorders</b>        |                                                                                                                                                  |

|                                                             |                                      |
|-------------------------------------------------------------|--------------------------------------|
| Common                                                      | Menstruation irregular e             |
| Uncommon                                                    | Amenorrhoea e                        |
| <b>General disorders and administration site conditions</b> |                                      |
| Very common                                                 | Fatigue, asthenia, peripheral oedema |
| Common                                                      | Pyrexia                              |
| Uncommon                                                    | Non-cardiac chest pain               |
| Rare                                                        | Impaired wound healing               |
| <b>Investigations</b>                                       |                                      |
| Very common                                                 | Weight decreased                     |

a Includes all reactions within the 'infections and infestations' system organ class including (common) pneumonia and (uncommon) herpes zoster, sepsis, and isolated cases of opportunistic infections [e.g. aspergillosis, candidiasis, pneumocystis jirovecii (carinii) pneumonia (PJP, PCP) and hepatitis B (see also section 4.4)]

b Includes different bleeding events not listed individually

c Includes (common) pneumonitis, interstitial lung disease, lung infiltration and (rare) pulmonary alveolar haemorrhage, pulmonary toxicity, and alveolitis

d Includes (very common) stomatitis, (common) aphthous stomatitis, mouth and tongue ulceration and (uncommon) glossodynia, glossitis

e Frequency based upon number of women from 10 to 55 years of age in pooled data
