# Supplementary material for: The use of everolimus in the treatment of neurocognitive problems in tuberous sclerosis (TRON): study protocol for a randomised controlled trial
Source: PubMed Central journal article supplement (PMC4981993; doi:10.1186/s13063-016-1446-6), 2016-08-11
Supplement: 13063_2016_1446_MOESM3_ESM.pdf [file 13063_2016_1446_MOESM3_ESM.pdf]

**Additional File 3. Recommended treatment of side effects.**

| <b>Known undesirable effects<br/>of study drug</b> | <b>Recommended treatment</b>                                                                                                                                                                                                                                                    |
|----------------------------------------------------|---------------------------------------------------------------------------------------------------------------------------------------------------------------------------------------------------------------------------------------------------------------------------------|
| Infections                                         | Patients are at an increased risk of infection. If an infection occurs, anti-infectives should be prescribed as clinically appropriate. In cases of clinically significant infection, consideration should be given to withhold study medication until resolution of infection. |
| Non-infectious pneumonitis                         | If this develops, consultation with a pulmonologist is recommended, recorded and managed appropriately as outlined in the protocol.                                                                                                                                             |
| Mouth ulcers / stomatitis / oral mucositis         | These are treated using appropriate locally available supportive care.                                                                                                                                                                                                          |

|                                     |                                                                                                                       |
|-------------------------------------|-----------------------------------------------------------------------------------------------------------------------|
| Hyperlipidaemia /<br>hyperglycaemia | These are treated according to local best clinical practice. GP to be informed of any incidences of hyperlipidaemia   |
| Diarrhoea                           | If attributed to study drug toxicity, this may be treated with loperamide. Other medications may be used as required. |
