# Supplementary material for: The use of everolimus in the treatment of neurocognitive problems in tuberous sclerosis (TRON): study protocol for a randomised controlled trial
Source: PubMed Central journal article supplement (PMC4981993; doi:10.1186/s13063-016-1446-6), 2016-08-11
Supplement: 13063_2016_1446_MOESM5_ESM.pdf [file 13063_2016_1446_MOESM5_ESM.pdf]

**Additional File 5. Study assessment schedule**

| Assessment                   | Screening visit | Baseline +<br>Start<br>treatment | 2 weeks | 4 weeks | 6 weeks | 12 weeks | 24 weeks (End<br>Treatment) | 36 weeks<br>(Follow up) |
|------------------------------|-----------------|----------------------------------|---------|---------|---------|----------|-----------------------------|-------------------------|
| Time point (weeks)           | -4 to -1        | 0                                | 2       | 4       | 6       | 12       | 24                          | 36                      |
| Visit no.                    | 1               | 2                                | 3       | 4       | 5       | 6        | 7                           | 8                       |
| Written Informed Consent     | X               |                                  |         |         |         |          |                             |                         |
| Inclusion/Exclusion Criteria | X               |                                  |         |         |         |          |                             |                         |

| Assessment                                                                     | Screening visit | Baseline +<br>Start<br>treatment | 2 weeks | 4 weeks | 6 weeks | 12 weeks | 24 weeks (End<br>Treatment) | 36 weeks<br>(Follow up) |
|--------------------------------------------------------------------------------|-----------------|----------------------------------|---------|---------|---------|----------|-----------------------------|-------------------------|
| Time point (weeks)                                                             | -4 to -1        | 0                                | 2       | 4       | 6       | 12       | 24                          | 36                      |
| Visit no.                                                                      | 1               | 2                                | 3       | 4       | 5       | 6        | 7                           | 8                       |
| Medical History/<br>Current Medical Conditions/<br>TSC check                   | X               |                                  |         |         |         |          |                             |                         |
| Hepatitis screen and HIV<br>history                                            | X               |                                  |         |         |         |          |                             |                         |
| Serum pregnancy test for<br>female patients / ask males<br>if partner pregnant | X               | X                                | X       | X       | X       | X        | X                           | X                       |
| Prior/Current concomitant<br>medications                                       | X               | X                                | X       | X       | X       | X        | X                           |                         |
| Randomisation                                                                  |                 | X                                |         |         |         |          |                             |                         |



| Assessment                          | Screening visit | Baseline +<br>Start<br>treatment | 2 weeks | 4 weeks | 6 weeks | 12 weeks | 24 weeks (End<br>Treatment) | 36 weeks<br>(Follow up) |
|-------------------------------------|-----------------|----------------------------------|---------|---------|---------|----------|-----------------------------|-------------------------|
| Time point (weeks)                  | -4 to -1        | 0                                | 2       | 4       | 6       | 12       | 24                          | 36                      |
| Visit no.                           | 1               | 2                                | 3       | 4       | 5       | 6        | 7                           | 8                       |
| Coagula - tion Studies<br>(PTT/INR) | X               |                                  |         |         |         | X        | X                           |                         |
| Serum Chemistry <sup>c</sup>        | X               | X                                | X       | X       | X       | X        | X                           |                         |
| Serum Lipid Profile <sup>d</sup>    | X               | X                                |         |         |         | X        | X                           |                         |
| Dipstick Urinalysis <sup>e</sup>    | X               | X                                | X       | X       | X       | X        | X                           | X                       |
| Spirometry <sup>f</sup>             | X               | X                                | X       | X       | X       | X        | X                           | X                       |
| PK Assessments                      |                 |                                  | X       | X       | X       | X        | X                           |                         |
| Adverse Events                      | X               | X                                | X       | X       | X       | X        | X                           | X                       |
| Seizure diary                       | X               | X                                | X       | X       | X       | X        | X                           | X                       |
| Brain DTI MR Scan                   |                 | X                                |         |         |         |          | X                           |                         |

<sup>a</sup> Vital signs: pulse, respiration rate, blood pressure, temperature, height, weight.

<sup>b</sup> Haematology: hemoglobin, hematocrit, platelets, red blood cell count, white blood cell count, absolute and differential including neutrophils, lymphocytes, monocytes, eosinophils, basophils.

<sup>c</sup> Serum chemistry: total LDH, fasting glucose, sodium, magnesium, phosphate, potassium, creatinine, blood urea, albumin, total protein, SGOT (AST), SGPT (ALT), total bilirubin, alkaline phosphatase, uric acid, calcium, CK.

<sup>d</sup> Serum lipid profile: total cholesterol, triglycerides, LDL, HDL.

<sup>e</sup> Urinalysis: pH, protein, glucose, blood, ketones, leucocytes.

<sup>f</sup> FEV<sub>1</sub>, FVC

\* Patients are not to take study drug (or placebo) on day on which blood levels are measured until after blood samples have been taken.
