# Supplementary material for: The use of everolimus in the treatment of neurocognitive problems in tuberous sclerosis (TRON): study protocol for a randomised controlled trial
Source: Springer Nature journal article supplement (doi:10.1186/s13063-016-1446-6), 2016-08-11
Supplement: MOESM4 [file 10579432]

**Additional File 4. Neuropsychological assessment schedule.**

|                             |                                     |                                   |                                    |                                                             |                                       |                 |
|-----------------------------|-------------------------------------|-----------------------------------|------------------------------------|-------------------------------------------------------------|---------------------------------------|-----------------|
| <b>Visit 1</b>              | <b>Visit 2</b>                      | <b>Visit 4</b>                    | <b>Visit 6</b>                     | <b>Visit 7</b>                                              | <b>Visit 8</b>                        | Max Time to     |
| <b>Eligibility visit</b>    | <b>Baseline &amp; randomisation</b> | <b>4-week assessment</b>          | <b>3-month assessment</b>          | <b>6-month assessment</b>                                   | <b>Post-treatment assessment</b>      | administer each |
| Approx 4 weeks Pre-baseline | Week 0<br>Then start treatment      | Week 4<br>After 1 mo of treatment | Week 12<br>After 3 mo of treatment | Week 24<br>After 6 mo of treatment.<br>Treatment then ends. | Week 36<br>3 mo after treatment ended | test            |



|                                          |                                              |                                          |                                              |                                              |                                              |          |
|------------------------------------------|----------------------------------------------|------------------------------------------|----------------------------------------------|----------------------------------------------|----------------------------------------------|----------|
| SWM (CANTAB)<br>- ≥4 between errors      | SWM (CANTAB)<br>- ≥4 between errors          | SWM (CANTAB)<br>- ≥4 between errors      | SWM (CANTAB)<br>- ≥4 between errors          | SWM (CANTAB)<br>- ≥4 between errors          | SWM (CANTAB)<br>- ≥4 between errors          | 10 mins  |
| Dual task (TEA)<br>- dual task decrement | Dual task (TEA)<br>- dual task decrement     | Dual task (TEA)<br>- dual task decrement | Dual task (TEA)<br>- dual task decrement     | Dual task (TEA)<br>- dual task decrement     | Dual task (TEA)<br>- dual task decrement     | 10 mins  |
|                                          |                                              |                                          |                                              |                                              |                                              |          |
| National Adult Reading Test              |                                              |                                          |                                              |                                              |                                              | < 5 mins |
|                                          | Rapid Visual Information Processing (CANTAB) |                                          | Rapid Visual Information Processing (CANTAB) | Rapid Visual Information Processing (CANTAB) | Rapid Visual Information Processing (CANTAB) | 7 mins   |
|                                          | Spatial span (CANTAB)                        |                                          | Spatial span (CANTAB)                        | Spatial span (CANTAB)                        | Spatial span (CANTAB)                        | 5 mins   |

|                                           |                       |                       |                        |                             |                                     |                                       |
|-------------------------------------------|-----------------------|-----------------------|------------------------|-----------------------------|-------------------------------------|---------------------------------------|
|                                           | IDED (CANTAB)         |                       | IDED (CANTAB)          | IDED (CANTAB)               | IDED (CANTAB)                       | 10-15 mins                            |
|                                           | Verbal fluency test   |                       | Verbal fluency test    | Verbal fluency test         | Verbal fluency test                 | 3 mins                                |
|                                           | Cancellation task     |                       | Cancellation task      | Cancellation task           | Cancellation task                   | 5 mins                                |
|                                           | Symptom Checklist-90R | Symptom Checklist-90R | Symptom Checklist-90 R | Symptom Checklist-90 R      | Symptom Checklist-90 R              | 15 mins                               |
|                                           | QOLIE                 |                       | QOLIE                  | QOLIE                       | QOLIE                               | 10 mins                               |
|                                           | Liverpool SS scale    | Liverpool SS scale    | Liverpool SS scale     | Liverpool SS scale          | Liverpool SS scale                  |                                       |
| Start seizure diary (at wks -4 to week 0) | Seizure diary         | Seizure diary         | Seizure diary          | Seizure diary               | Seizure diary                       | Filled in at home daily               |
|                                           | VABS -2               |                       |                        | VABS-2                      | VABS-2                              | Filled in by carer/relative (45 mn)   |
|                                           | Social Responsiveness |                       |                        | Social Responsiveness Scale | Social Responsiveness Scale - Adult | Filled in (at home) by carer/relative |

|  |                                          |  |  |                                          |                                       |                                                     |
|--|------------------------------------------|--|--|------------------------------------------|---------------------------------------|-----------------------------------------------------|
|  | Scale - Adult                            |  |  | - Adult                                  |                                       | (20 mn)                                             |
|  | Social<br>Communication<br>Questionnaire |  |  | Social<br>Communication<br>Questionnaire | Social Communication<br>Questionnaire | Filled in (at home)<br>by carer/relative<br>(10 mn) |
